# Supplementary material for: Tuning the mechanical properties of weakly phase-separated olefin block copolymer by establishing co-crystallization structure with the aid of linear polyethylene: the dependence on molecular chain length
Source: Royal Society of Chemistry journal article supplement (doi:10.1039/c7ce00653e), 2017-01-01
Supplement: c7ce00653e1.pdf [file c7ce00653e1.pdf]

## Tuning mechanical properties of weakly-phase-separated olefin block copolymer by establishing co-crystallization structure with the aid of linear polyethylene: the dependence on molecular chain length

Yongsheng Zhao\* <sup>a, b</sup>, Lianmeng Si<sup>a</sup>, Lamei Wang<sup>a</sup>, Wanbin Dang<sup>a</sup>, Jingjing Bao<sup>a</sup>, Zhaoqing Lu<sup>a</sup>, Meiyun Zhang<sup>a</sup>

*a. College of Bioresources Chemical and Materials Engineering, Shaanxi Provincial Key Laboratory of Papermaking Technology and Specialty Paper Development, Shaanxi University of Science and Technology, Xi'an, 710021*

*b. State Key Laboratory of Pulp and Paper Engineering, South China University of Technology, Guangzhou, 510640*

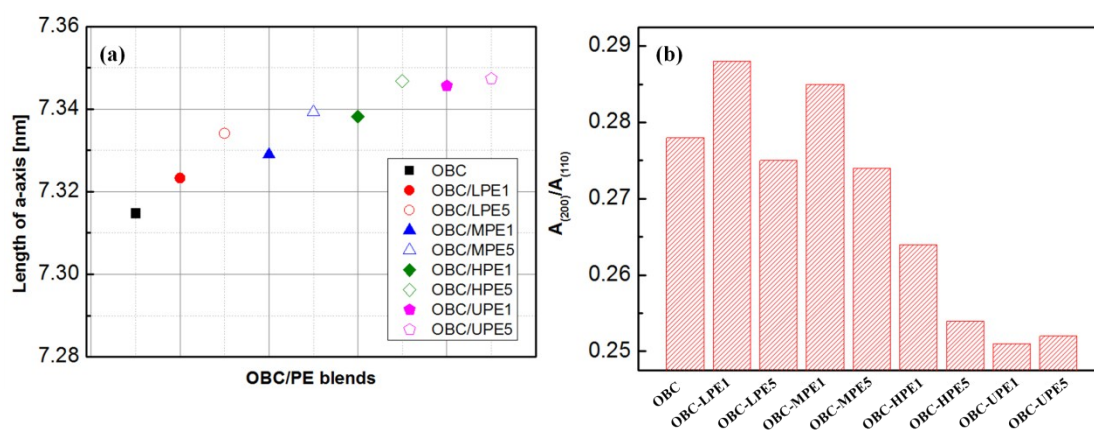

**Figure S1.** (a). change of the length of a-axis of PE mixed crystals as a function of PE content; (b).the area ratio between (200) and (110) reflections for OBC/PE blends.

As can be seen in Figure S1, the length of a-axis gradually increases with the increase of PE content, indicating an obvious a-axis expansion. In addition, OBC/UPE shows a great reduction of  $A_{(200)}/A_{(110)}$ , reflecting the distorting of crystal lattice and the formation of hexagonal phase.

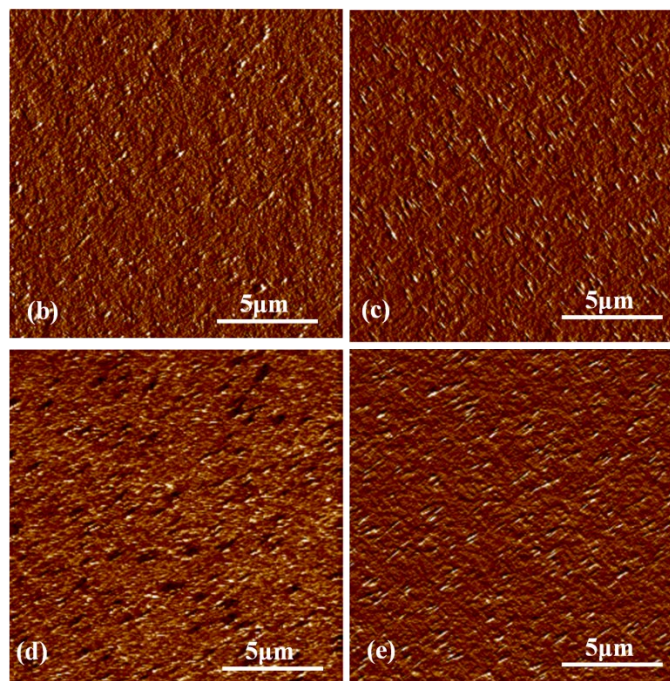

**Figure S2.** Typical AFM images of OBC/PE samples: (a). OBC-LPE1; (b). OBC-MPE1; (c). OBC-LPE5; (d).OBC-MPE5.

As can be seen in Figure S2, there is no obvious shish-kebab structures in OBC/LPE and OBC/MPE samples. The crystalline morphology of these samples is close to that of OBC/HPE with the same PE content.

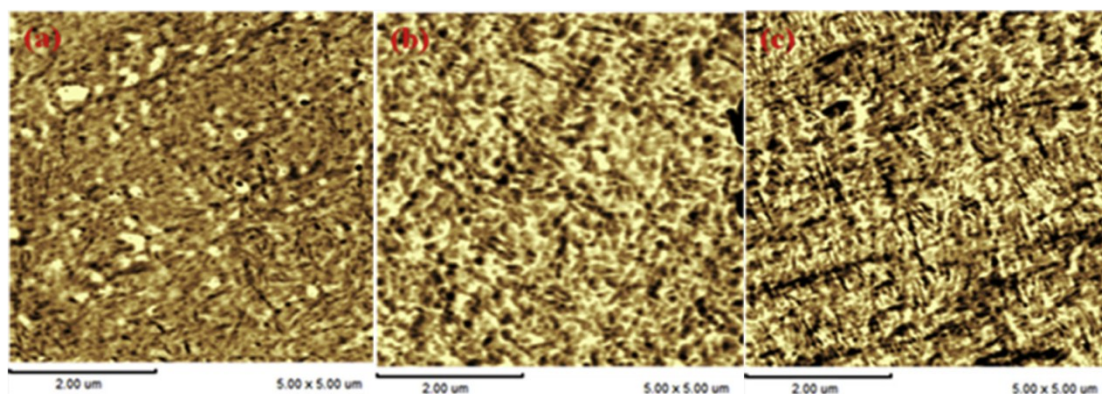

**Figure S3.** Representative AFM images for injection-molded OBC/UPE samples containing different content of UPE: (a). neat OBC; (b). OBC/UPE1; (c). OBC-UPE5.

As shown in Figure S3, tapping-mode AFM was used to investigate the crystalline morphology of OBC/PE samples. Clear oriented lamellar structure along with some spherulites can be found in neat OBC. For OBC/UPE1, a small number of shish-kebabs appear along the flow direction. When UPE content reaches 5wt%, the number of shish-kebabs increases and oriented

parallel with each other along the flow direction, indicating a high crystal orientation.
